# Supplementary material
Source: PubMed Central journal article supplement (PMC7597556)
Supplement: NIHMS1636865-supplement-Suppl_Info.pdf [file NIHMS1636865-supplement-Suppl_Info.pdf]

## Suppl. Figure S1.

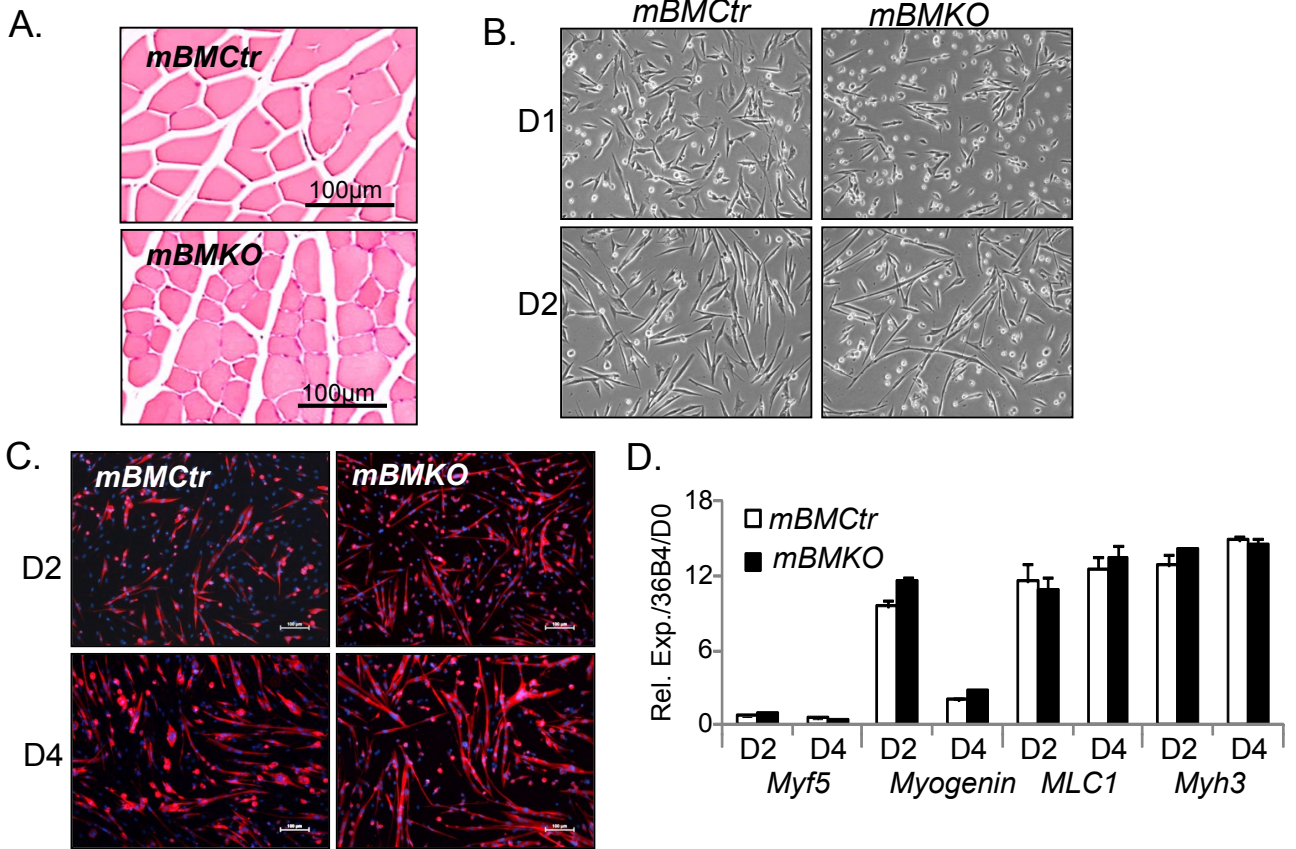

Fig. S1 Loss of Bmal1 in mature myocyte does not alter myofiber fiber size and myoblast differentiation. (A) Representative images of H/E histology of mBMCtr and mBMKO TA muscle cross section. (B, C) representative images of phase-contrast (B) and immunostaining of myosin heavy chain (C) of differentiating mBMCtr and mBMKO primary myoblasts. (D) RT-qPCR analysis of myogenic gene expression day 2 and 4-differentiated mBMCtr and mBMKO primary myoblasts (n=3).

## Suppl. Figure S2.

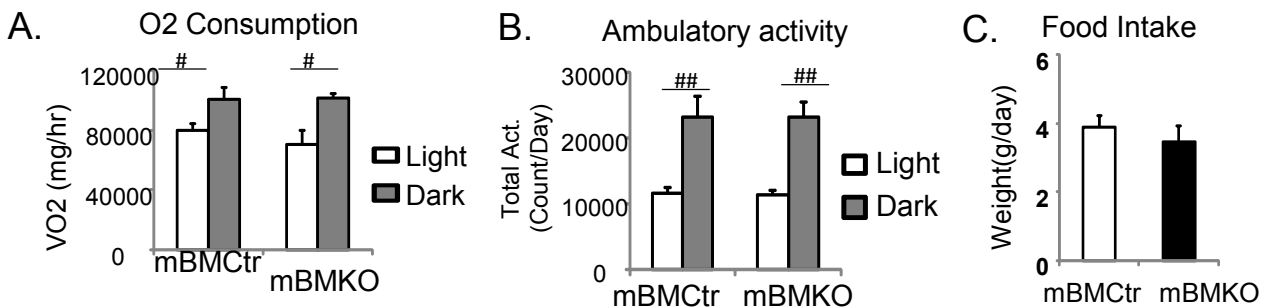

Fig. S2 Analysis of energy homeostasis by CLAMS indirect calorimetry. Analysis of oxygen consumption (A), ambulatory activity (B) and daily food intake (C) in mBMCtr and mBMKO mice (n=6/group) during light and dark cycles as monitored by CLAMS for 7 days. #, ##: P ≤ 0.05 or 0.01 light vs. dark.

**Supplemental Table 1. Primary antibodies list.**

| Antibody              | Source                               | Cat#       | Dilution |
|-----------------------|--------------------------------------|------------|----------|
| myosin heavy chain 2B | Developmental Studies Hybridoma Bank | BF-F3      | 1:100    |
| myosin heavy chain 2A | Developmental Studies Hybridoma Bank | SC-71      | 1:100    |
| PDK4                  | Proteintech                          | 12949-1-AP | 1:1000   |
| Glut4                 | Cell Signaling                       | 2213S      | 1:1000   |
| Bmal1                 | Abcam                                | AB93806    | 1:500    |
| Rev-erba              | Proteintech                          | 14506-1-AP | 1:1000   |
| PGC-1 $\alpha$        | Millipore                            | ST1204     | 1:1000   |
| AMPK $\alpha$         | Cell Signaling                       | 2532S      | 1:1000   |
| Phospho-AMPK $\alpha$ | Cell Signaling                       | 2535S      | 1:1000   |
| Phospho-Akt (Ser473)  | Cell Signaling                       | 4060S      | 1:1000   |
| Akt                   | Cell Signaling                       | 4691S      | 1:1000   |
| P-ACC                 | Cell Signaling                       | 11818      | 1:1000   |
| ACC                   | Cell Signaling                       | 3676       | 1:500    |
| FASN                  | Santa Cruz                           | sc-48357   | 1:1000   |
| $\beta$ -actin        | Abcam                                | AB3280     | 1:4000   |
| GAPDH                 | ThermoFisher                         | AM4300     | 1:3000   |

**Supplemental Table 2. Primer sequence for Bmal1 ChIP-qPCR analysis.**

| Genes    |         | Sequences                  |
|----------|---------|----------------------------|
| Rev-erba | Forward | TGAAGGGAAAGTAGCAGGTA       |
|          | Reverse | CTCTTCCCGTTAGCCAATCA       |
| Tbp      | Forward | ACACTGCTGTTGGTGATTGTTGGTTT |
|          | Reverse | TGGGAAGGCGGAATGTATCTGGCA   |
| Glut4    | Forward | TGTTTCCCTTCGACCTCCCC       |
|          | Reverse | TCAGCCCCACCAGAGAGTCT       |
| Pdp1     | Forward | TGGGCTCAATGGACTCGTTT       |
|          | Reverse | TCATTTTGCAGTTAACAGCCAAGA   |
| Tbc1d1   | Forward | GAACCTCGCACGCCAAAACAG      |
|          | Reverse | GAGCTCGGGGAAGGTGCAAG       |
| Hk2      | Forward | CAGTCTGCTTGCTTGGAGGAAAC    |
|          | Reverse | ACAGCTCCGCACAGACCCTA       |
| Pdh1     | Forward | AGGAGATGCAGGTAGGAGGG       |
|          | Reverse | CACAGCCTCACACCCTTTCT       |
